# Supplementary material for: Clinical Significance of Ventricular Premature Contraction Provoked by the Treadmill Test
Source: MDPI journal article supplement (doi:10.3390/medicina58040556), 2022-04-18
Supplement: s1 [file s1]

**Supplement Table S1. Clinical Correlation in exercise provoked VPC group (n=200, multivariable)**

|        | VPC <sub>Y</sub> (n=32)     | VPC <sub>E</sub> (n=21) | VPC <sub>R</sub> (n=20)      |
|--------|-----------------------------|-------------------------|------------------------------|
| Age    |                             | 1.031 (0.995-1.068)     |                              |
| FHxCAD |                             | 3.407 (0.968-11.995)    |                              |
| FHxSCD | <b>5.786 (1.111-30.120)</b> |                         | <b>10.875 (2.026-58.363)</b> |

Data are presented as odds ratio (95% confidence interval)

Included variable: age, sex, BMI, FHxCAD, FHxSCD, DM, HTN, maximal HR during exercise, maximal SBP during exercise.

Abbreviations: abbreviations are listed in Table 1.

The values in bold indicate statistical significance (p<0.05).

**Supplement Table S2. Baseline characteristics of VPC<sub>E</sub> (n=21) and VPC<sub>R</sub> (n=20)**

|                        | VPC <sub>E</sub><br>(n=21) | VPC <sub>R</sub><br>(n=20) | P value<br>(VPC <sub>E</sub> vs VPC <sub>R</sub> ) |
|------------------------|----------------------------|----------------------------|----------------------------------------------------|
| <b>Demographics</b>    |                            |                            |                                                    |
| Age                    | 57.7 ± 16.1                | 53.8 ± 17.9                | 0.465                                              |
| Sex (male)             | 3 (14.3%)                  | 5 (25.0%)                  | 0.454                                              |
| BMI                    | 25.2 ± 2.8                 | 24.5 ± 2.7                 | 0.429                                              |
| <b>Pre. Medical Hx</b> |                            |                            |                                                    |
| DM                     | 3 (14.3%)                  | 3 (15.0%)                  | 1.000                                              |
| HTN                    | 9 (42.9%)                  | 9 (45.0%)                  | 1.000                                              |
| Dyslipidemia           | 3 (14.3%)                  | 6 (30.0%)                  | 0.277                                              |
| CVA                    | 2 (9.5%)                   | 2 (10.0%)                  | 1.000                                              |
| PAD                    | 2 (9.5%)                   | 2 (10.0%)                  | 1.000                                              |
| <b>Exercise Test</b>   |                            |                            |                                                    |
| Maximal HR             | 154.1 ± 20.7               | 158.1 ± 24.7               | 0.580                                              |
| Maximal SBP            | 190.8 ± 35.0               | 185.9 ± 33.5               | 0.652                                              |
| Exercise capacity      | 11.4 ± 2.0                 | 11.2 ± 2.7                 | 0.788                                              |
| TMT positive           | 5 (23.8%)                  | 3 (15.0%)                  | 0.697                                              |

Data are presented as mean ± standard deviation or n (%).

Abbreviations: abbreviations are listed in Table 1.
